# Supplementary material for: Zika virus infection during the period of maximal brain growth causes microcephaly and corticospinal neuron apoptosis in wild type mice
Source: PubMed Central journal article supplement (PMC5054421; doi:10.1038/srep34793), 2016-10-07
Supplement: srep34793-s1.pdf [file srep34793-s1.pdf]

Zika virus infection during the period of maximal brain growth causes microcephaly and corticospinal neuron apoptosis in wild type mice

Wen-Chin Huang<sup>1,2</sup>, Rachy Abraham<sup>3</sup>, Byoung-Shik Shim<sup>3</sup>, Hyeryun Choe<sup>3,4</sup> & Damon T. Page<sup>1,2,4</sup>

<sup>1</sup>*Department of Neuroscience, The Scripps Research Institute, Jupiter, Florida*

<sup>2</sup>*The Doctoral Program in Chemical and Biological Sciences at The Scripps Research Institute, Jupiter, Florida*

<sup>3</sup>*Department of Immunology and Microbial Science, The Scripps Research Institute, Jupiter, Florida*

<sup>4</sup>*Authors for correspondence: Hyeryun Choe ([HChoe@scripps.edu](mailto:HChoe@scripps.edu)) or Damon T. Page ([paged@scripps.edu](mailto:paged@scripps.edu))*

**Video 1:** Wild type C57BL/6 mice intracranially injected with ZIKV at P7, 4dpi. Mice display severe neurological symptoms.

**Video 2:** Wild type C57BL/6 mice intracranially injected with saline at P7, 4dpi. Mice appear normal and do not show neurological symptoms.
